# Supplementary material for: Atrial fibrillation: real-life experience of a rhythm control with electrical cardioversion in a community hospital
Source: Springer Nature journal article supplement (doi:10.1186/s12872-024-03885-0), 2024-04-17
Supplement: MOESM1 [file 26990196]

## Supplementary material

### Atrial fibrillation: real-life experience of a rhythm control with electrical cardioversion in a community hospital

Artemiy Okhotin, Maxim Osipov, Vasilij Osipov, Anton Barchuk

Figure S1: Flowchart illustrating acquisition of data on cardioversions.

Table S1. Univariate predictors of successful cardioversion.

Table S2. First cardioversion success probabilities in subgroups.

Table S3. First cardioversion success probabilities in subgroups.

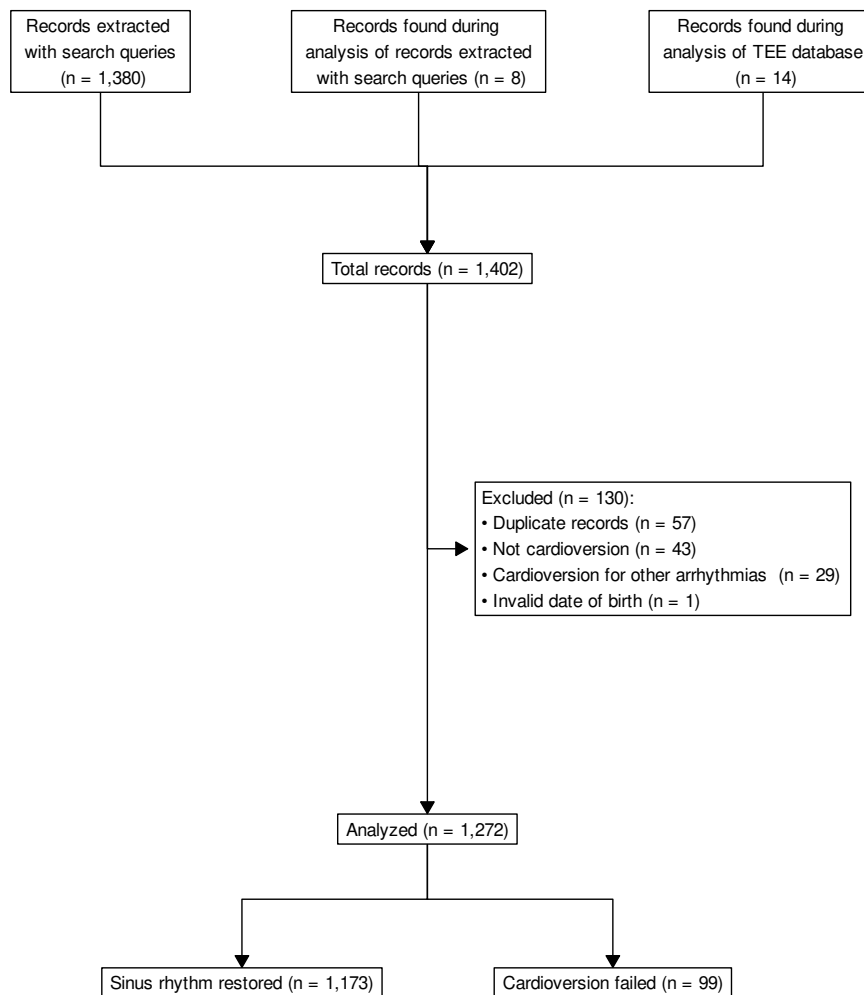

Figure S1: Flowchart illustrating acquisition of data on cardioversions.

Table S1: Univariate predictors of successful cardioversion.

| <b>Characteristic</b>                     | <b>OR</b> | <b>95% CI</b> | <b>p-value</b> |
|-------------------------------------------|-----------|---------------|----------------|
| Age > 65 years                            | 0.95      | 0.63–1.43     | 0.8            |
| Men (vs. Women)                           | 1.04      | 0.69–1.57     | 0.9            |
| Heart failure                             | 1.00      | 0.66–1.52     | > 0.9          |
| Arterial hypertension                     | 1.23      | 0.81–1.86     | 0.3            |
| Coronary heart disease                    | 1.31      | 0.78–2.33     | 0.3            |
| Diabetes mellitus                         | 1.88      | 0.95–4.26     | 0.10           |
| Arrhythmia > 1 week                       | 0.39      | 0.26–0.59     | < 0.001        |
| Artial fibrillation (vs. flutter)         | 0.84      | 0.43–1.52     | 0.6            |
| First cardioversion                       | 0.39      | 0.26–0.59     | < 0.001        |
| Outpatient (vs. inpatient)                | 3.42      | 2.14–5.38     | < 0.001        |
| Performed by cardiologist (vs. internist) | 0.93      | 0.59–1.44     | 0.8            |
| TEE performed                             | 0.60      | 0.39–0.93     | 0.019          |

<sup>1</sup> OR = Odds Ratio, CI = Confidence Interval

Table S2: First cardioversion success probabilities in subgroups.

|                                   |                     | N   | Probability, % | 95% CI <sup>1</sup> |
|-----------------------------------|---------------------|-----|----------------|---------------------|
| <b>Patient characteristics</b>    |                     |     |                |                     |
| Age                               | Older than 65 years | 182 | 84             | 77-88               |
|                                   | 65 years or younger | 176 | 89             | 83-93               |
| Sex                               | Male                | 185 | 87             | 81-92               |
|                                   | Female              | 173 | 86             | 81-91               |
| Heart failure                     | Yes                 | 124 | 87             | 80-92               |
|                                   | No                  | 234 | 86             | 81-90               |
| Arterial hypertension             | Yes                 | 142 | 85             | 78-90               |
|                                   | No                  | 216 | 87             | 82-91               |
| Coronary heart disease            | Yes                 | 52  | 85             | 71-93               |
|                                   | No                  | 306 | 87             | 82-90               |
| Diabetes mellitus                 | Yes                 | 34  | 94             | 79-99               |
|                                   | No                  | 324 | 85             | 81-89               |
| Body mass index                   | More than 30        | 90  | 87             | 77-93               |
|                                   | 30 or less          | 113 | 89             | 82-94               |
| LV ejection fraction              | Less than 60%       | 88  | 93             | 85-97               |
|                                   | 60% or more         | 32  | 72             | 53-86               |
| Left atrial index                 | Above the median    | 22  | 91             | 69-98               |
|                                   | Median or below     | 24  | 88             | 67-97               |
| <b>Arrhythmia characteristics</b> |                     |     |                |                     |
| Arrhythmia duration               | More than 7 days    | 237 | 85             | 80-89               |
|                                   | 7 days or less      | 121 | 88             | 81-93               |
| Type of arrhythmia                | Atrial fibrillation | 299 | 86             | 81-90               |
|                                   | Atrial flutter      | 59  | 88             | 76-95               |
| Settings                          | Outpatient          | 265 | 89             | 85-93               |
|                                   | Inpatient           | 93  | 77             | 67-85               |
| Performed by                      | Cardiologist        | 267 | 85             | 80-89               |
|                                   | Internist           | 91  | 89             | 80-94               |
| TEE before procedure              | Performed           | 221 | 87             | 82-91               |
|                                   | Not performed       | 137 | 85             | 78-91               |

<sup>1</sup> CI - confidence interval.

Table S3: Factors associated with inpatient settings

| <b>Characteristic</b>                          | <b>N</b> | <b>OR</b> | <b>95% CI</b> |
|------------------------------------------------|----------|-----------|---------------|
| Age (years)                                    | 1,272    | 1.04      | 1.02—1.05     |
| Sex                                            | 1,272    |           |               |
| Male                                           |          |           |               |
| Female                                         |          | 1.37      | 0.99—1.90     |
| Arterial hypertension                          | 1,272    | 0.62      | 0.45—0.85     |
| Coronary heart disease                         | 1,272    | 1.83      | 1.27—2.60     |
| Heart failure                                  | 1,272    | 2.66      | 1.90—3.74     |
| Diabetes mellitus                              | 1,272    | 0.44      | 0.23—0.78     |
| TEE performed                                  | 1,272    | 4.13      | 2.96—5.78     |
| Arrhythmia more than 7 days                    | 1,272    | 2.98      | 2.14—4.18     |
| Chronic anticoagulation                        | 1,272    | 0.25      | 0.18—0.35     |
| Type of arrhythmia                             | 1,272    |           |               |
| Atrial Fibrillation                            |          |           |               |
| Atrial Flutter                                 |          | 0.97      | 0.59—1.53     |
| Body mass index                                | 778      | 0.99      | 0.96—1.02     |
| LV ejection fraction, %                        | 477      | 0.97      | 0.95—0.98     |
| Index of left atrial volume, ml/m <sup>2</sup> | 304      | 1.01      | 0.98—1.03     |

<sup>1</sup> OR = Odds Ratio, CI = Confidence Interval
